# Supplementary material
Source: ML conference proceedings conference paper supplement (https://openreview.net/forum?id=ffFcRPpnWx)
Supplement: supplementary_material [file attachment]

## A Brute-force edit distance certification

In this appendix, we show that an edit distance certification mechanism based on brute-force search is computationally infeasible. Suppose we are interested in issuing an edit distance certificate at radius  $r$  for a sequence classifier  $f$  at input  $\mathbf{x}$ . Recall from (1) that in order to issue a certificate, we must show there exists no input  $\bar{\mathbf{x}}$  within the edit distance neighborhood  $\mathcal{N}_r(\mathbf{x})$  that would change  $f$ 's prediction. This problem can theoretically be tackled in a brute-force manner, by querying  $f$  for all inputs in  $\mathcal{N}_r(\mathbf{x})$ . In the best case, this would take time linear in  $|\mathcal{N}_r(\mathbf{x})|$ , assuming  $f$  responds to queries in constant time. However the following lower bound [65], shows that the size of the edit distance neighborhood is too large even in the best case:

$$|\mathcal{N}_r(\mathbf{x})| \geq \sum_{i=0}^r 255^i \sum_{j=i-r}^r \binom{|\mathbf{x}|+j}{i} \geq 255^r.$$

For example, applying the loosest bound that is independent of  $\mathbf{x}$ , we see that brute-force certification at radius  $r = 128$  would require in excess of  $255^r \approx 10^{308}$  queries to  $f$ . In contrast, our probabilistic certification mechanism (Figure 1) makes  $n_{\text{pred}} + n_{\text{bnd}}$  queries to  $f$ , and we can provide high probability guarantees when the number of queries is of order  $10^3$  or  $10^4$ .

## B Proofs for Section 4

In this appendix, we provide proofs of the theoretical results stated in Section 4.

### B.1 Proof of Proposition 3

A sufficient condition for (8) is

$$\min_{\bar{\mathbf{x}} \in \mathcal{N}_r(\mathbf{x})} \min_{h \in \mathcal{F}(\bar{\mathbf{x}})} p_y(\bar{\mathbf{x}}; h) \geq \max_{\bar{\mathbf{x}} \in \mathcal{N}_r(\mathbf{x})} \max_{h \in \mathcal{F}(\bar{\mathbf{x}})} \left( \eta_y + \max_{y' \neq y} p_{y'}(\bar{\mathbf{x}}; h) - \min_{y' \neq y} \eta_{y'} \right). \quad (17)$$

We first consider the multi-class case where  $|\mathcal{Y}| > 2$ . If  $\eta_y \geq \min_{y' \neq y} \eta_{y'}$ , then  $p_y(\bar{\mathbf{x}}; h) \geq \max_{y' \neq y} p_{y'}(\bar{\mathbf{x}}; h)$  by (17) and we can upper-bound  $\max_{y' \neq y} p_{y'}(\bar{\mathbf{x}}; h)$  by  $\frac{1}{2}$ . On the other hand, if  $\eta_y < \min_{y' \neq y} \eta_{y'}$ , we can only upper-bound  $\max_{y' \neq y} p_{y'}(\bar{\mathbf{x}}; h)$  by 1. Thus when  $|\mathcal{Y}| > 2$  (17) implies

$$\min_{\bar{\mathbf{x}} \in \mathcal{N}_r(\mathbf{x})} \min_{h \in \mathcal{F}(\bar{\mathbf{x}})} p_y(\bar{\mathbf{x}}; h) \geq \begin{cases} \frac{1}{2} + \eta_y - \min_{y' \neq y} \eta_{y'}, & \eta_y \geq \min_{y' \neq y} \eta_{y'}, \\ 1 + \eta_y - \min_{y' \neq y} \eta_{y'}, & \eta_y < \min_{y' \neq y} \eta_{y'}. \end{cases}$$

Next, we consider the binary case where  $|\mathcal{Y}| = 2$ . Since the confidences sum to 1, we have  $\max_{y' \neq y} p_{y'}(\bar{\mathbf{x}}; h) = 1 - p_y(\bar{\mathbf{x}}; h)$ . Putting this in (17) implies

$$\min_{\bar{\mathbf{x}} \in \mathcal{N}_r(\mathbf{x})} \min_{h \in \mathcal{F}(\bar{\mathbf{x}})} p_y(\bar{\mathbf{x}}; h) \geq \frac{1 + \eta_y - \min_{y' \neq y} \eta_{y'}}{2}.$$

### B.2 Proof of Lemma 4

Let  $r_S: S \rightarrow \{1, \dots, |S|\}$  be a bijection that returns the *rank* of an element in an ordered set  $S$ . Let  $\dot{r}_S: 2^S \rightarrow 2^{\{1, \dots, |S|\}}$  be an elementwise extension of  $r_S$  that returns a *set of ranks* for an ordered set of elements—i.e.,  $\dot{r}_S(U) = \{r_S(i) : i \in U\}$  for  $U \subseteq S$ . We claim  $m(\bar{\epsilon}) = \dot{r}_{\epsilon^*}^{-1}(\dot{r}_{\epsilon^*}(\bar{\epsilon}))$  is a bijection that satisfies the required property.

To prove the claim, we note that  $m$  is a bijection from  $2^{\bar{\epsilon}^*}$  to  $2^{\epsilon^*}$  since it is a composition of bijections  $\dot{r}_{\epsilon^*}: 2^{\bar{\epsilon}^*} \rightarrow 2^{\{1, \dots, l\}}$  and  $\dot{r}_{\epsilon^*}^{-1}: 2^{\{1, \dots, l\}} \rightarrow 2^{\epsilon^*}$  where  $l = |\bar{\epsilon}^*| = |\epsilon^*|$ . Next, we observe that  $\dot{r}_{\epsilon^*}(\bar{\epsilon})$  relabels indices in  $\bar{\epsilon}$  so they have the same effect when applied to  $\mathbf{z}^*$  as  $\bar{\epsilon}$  on  $\bar{\mathbf{x}}$  (this also holds for  $\dot{r}_{\epsilon^*}$  and  $\epsilon$ ). Thus

$$\begin{aligned} \text{apply}(\bar{\mathbf{x}}, \bar{\epsilon}) &= \text{apply}(\mathbf{z}^*, \dot{r}_{\epsilon^*}(\bar{\epsilon})) \\ &= \text{apply}(\mathbf{z}^*, \dot{r}_{\epsilon^*}(\dot{r}_{\epsilon^*}^{-1}(\dot{r}_{\epsilon^*}(\bar{\epsilon})))) \\ &= \text{apply}(\mathbf{x}, m(\bar{\epsilon})) \end{aligned}$$

as required. To prove the final statement, we use (4), (5) and (12) to write

$$\begin{aligned}
\frac{s(\bar{\epsilon}, \bar{\mathbf{x}}; h)}{s(\epsilon, \mathbf{x}; h)} &= \frac{\mathbf{1}_{h(\text{apply}(\bar{\mathbf{x}}, \bar{\epsilon}))=y} p_{\text{del}}^{|\bar{\mathbf{x}}| - |\bar{\epsilon}|} (1 - p_{\text{del}})^{|\bar{\epsilon}|}}{\mathbf{1}_{h(\text{apply}(\mathbf{x}, \epsilon))=y} p_{\text{del}}^{|\mathbf{x}| - |\epsilon|} (1 - p_{\text{del}})^{|\epsilon|}} \\
&= \frac{p_{\text{del}}^{|\bar{\mathbf{x}}| - |\mathbf{z}|} (1 - p_{\text{del}})^{|\mathbf{z}|} \mathbf{1}_{h(\mathbf{z})=y}}{p_{\text{del}}^{|\mathbf{x}| - |\mathbf{z}|} (1 - p_{\text{del}})^{|\mathbf{z}|} \mathbf{1}_{h(\mathbf{z})=y}} \\
&= p_{\text{del}}^{|\bar{\mathbf{x}}| - |\mathbf{x}|},
\end{aligned}$$

where the second last line follows from the fact that  $\text{apply}(\bar{\mathbf{x}}, \bar{\epsilon}) = \text{apply}(\mathbf{x}, \epsilon) = \mathbf{z}$ .

### B.3 Proof of Theorem 5

Let  $\bar{\epsilon}^*$  and  $\epsilon^*$  be defined as in Lemma 4. We derive an upper bound on the sum over  $\epsilon \in 2^{\epsilon^*}$  that appears in (13). Observe that

$$\begin{aligned}
\sum_{\epsilon \notin 2^{\epsilon^*}} s(\epsilon, \mathbf{x}; h) &\leq \sum_{\epsilon \notin 2^{\epsilon^*}} \Pr[G(\mathbf{x}) = \epsilon] \\
&= 1 - \sum_{\epsilon \in 2^{\epsilon^*}} \Pr[G(\mathbf{x}) = \epsilon] \\
&= 1 - p_{\text{del}}^{|\mathbf{x}| - |\epsilon^*|} \sum_{|\epsilon|=0}^{|\epsilon^*|} \binom{|\epsilon^*|}{|\epsilon|} p_{\text{del}}^{|\epsilon^*| - |\epsilon|} (1 - p_{\text{del}})^{|\epsilon|} \\
&= 1 - p_{\text{del}}^{|\mathbf{x}| - |\epsilon^*|}, \tag{18}
\end{aligned}$$

where the first line follows from the inequality  $\mathbf{1}_{h(\text{apply}(\mathbf{x}, \epsilon)=y)} \leq 1$ ; the second line follows from the law of total probability; the third line follows by constraining the indices  $\{1, \dots, |\mathbf{x}|\} \setminus \bar{\epsilon}^*$  to be deleted; and the last line follows from the normalization of the binomial distribution. Putting (18) and  $\sum_{\bar{\epsilon} \in 2^{\bar{\epsilon}^*}} s(\bar{\epsilon}, \bar{\mathbf{x}}; h) \geq 0$  in (13) gives

$$\begin{aligned}
p_y(\bar{\mathbf{x}}; h) &\geq p_{\text{del}}^{|\bar{\mathbf{x}}| - |\mathbf{x}|} \left( \mu_y - 1 - p_{\text{del}}^{|\mathbf{x}| - |\epsilon^*|} \right) \\
&= p_{\text{del}}^{|\bar{\mathbf{x}}| - |\mathbf{x}|} \left( \mu_y - 1 - p_{\text{del}}^{\frac{1}{2}(\text{dist}_{\text{LCS}}(\bar{\mathbf{x}}, \mathbf{x}) + |\mathbf{x}| - |\bar{\mathbf{x}}|)} \right). \tag{19}
\end{aligned}$$

In the second line above we use the following relationship between the LCS distance and the length of the LCS  $|\mathbf{z}^*| = |\epsilon^*|$ :

$$\text{dist}_{\text{LCS}}(\bar{\mathbf{x}}, \mathbf{x}) = |\bar{\mathbf{x}}| + |\mathbf{x}| - 2|\mathbf{z}^*|.$$

Since (19) is independent of the base classifier  $h$ , the lower bound on  $\rho(\bar{\mathbf{x}}, \mathbf{x}, \mu_y)$  follows immediately.

### B.4 Proof of Corollary 6

Since the length of  $\mathbf{x}$  can only be changed by inserting or deleting elements in  $\bar{\mathbf{x}}$ , we have

$$|\mathbf{x}| - |\bar{\mathbf{x}}| = n_{\text{ins}} - n_{\text{del}}. \tag{20}$$

We also observe that the LCS distance can be uniquely decomposed in terms of the counts of insertion ops  $m_{\text{ins}}$  and deletion ops  $m_{\text{del}}$ :  $\text{dist}_{\text{LCS}}(\bar{\mathbf{x}}, \mathbf{x}) = m_{\text{del}} + m_{\text{ins}}$ . These counts can in turn be related to the given decomposition of edit ops counts for generalized edit distance. In particular, any substitution must be expressed as an insertion and deletion under LCS distance, which implies  $m_{\text{ins}} = n_{\text{ins}} + n_{\text{sub}}$  and  $m_{\text{del}} = n_{\text{del}} + n_{\text{sub}}$ . Thus we have

$$\text{dist}_{\text{LCS}}(\bar{\mathbf{x}}, \mathbf{x}) = n_{\text{del}} + n_{\text{ins}} + 2n_{\text{sub}}. \tag{21}$$

Substituting (20) and (21) in (14) gives the required result.

## B.5 Proof of Theorem 7

Eliminating  $n_{\text{sub}}$  from (16) using the constraint  $n_{\text{sub}} = r - n_{\text{del}} - n_{\text{ins}}$ , we obtain a minimization problem in two variables:

$$\begin{aligned} \min_{n_{\text{ins}}, n_{\text{del}} \in \mathbb{N}_0} \quad & \psi(n_{\text{ins}}, n_{\text{del}}) \\ \text{s.t.} \quad & 0 \leq n_{\text{ins}} + n_{\text{del}} \leq r \end{aligned}$$

where  $\psi(n_{\text{ins}}, n_{\text{del}}) = p_{\text{del}}^{n_{\text{del}} - n_{\text{ins}}} (\mu_y - 1 + p_{\text{del}}^{r - n_{\text{del}}})$ . Observe that  $\psi$  is monotonically increasing in  $n_{\text{ins}}$  and  $n_{\text{del}}$ :

$$\begin{aligned} \frac{\psi(n_{\text{ins}} + 1, n_{\text{del}})}{\psi(n_{\text{ins}}, n_{\text{del}})} &= \frac{1}{p_{\text{del}}} \geq 1 \\ \frac{\psi(n_{\text{ins}}, n_{\text{del}} + 1)}{\psi(n_{\text{ins}}, n_{\text{del}})} &= \frac{(\mu_y - 1)p_{\text{del}}^{n_{\text{del}} + 1} + p_{\text{del}}^r}{(\mu_y - 1)p_{\text{del}}^{n_{\text{del}}} + p_{\text{del}}^r} \geq 1, \end{aligned}$$

where the second inequality follows since we only consider  $r$  and  $\mu_y$  such that the numerator and denominator are positive. Thus the minimizer is  $(n_{\text{ins}}^*, n_{\text{del}}^*, n_{\text{sub}}^*) = (0, 0, r)$  and we find  $\rho(\mathbf{x}; \mu_y) = \mu_y - 1 + p_{\text{del}}^r$ . The expression for the certified radius follows by solving  $\rho(\mathbf{x}; \mu_y) \geq \nu_y(\boldsymbol{\eta})$  for non-negative integer  $r$ .

## B.6 Proof of Corollary 8

Recall that Corollary 6 gives the following lower bound on the classifier’s confidence at  $\mathbf{x}$ :

$$\tilde{\rho}(\bar{\mathbf{x}}, \mathbf{x}, \mu_y) = p_{\text{del}}^{n_{\text{del}} - n_{\text{ins}}} (\mu_y - 1 + p_{\text{del}}^{n_{\text{sub}} + n_{\text{ins}}}).$$

Observe that we can replace  $\mu_y$  by a lower bound  $\underline{\mu}_y$  that holds with probability  $1 - \alpha$  (as is done in lines 4–6 of Figure 1) and obtain a looser lower bound  $\tilde{\rho}(\bar{\mathbf{x}}, \mathbf{x}, \underline{\mu}_y) \leq \tilde{\rho}(\bar{\mathbf{x}}, \mathbf{x}, \mu_y)$  that holds with probability  $1 - \alpha$ . Crucially, this looser lower bound has the same functional form, so all results depending on Corollary 6, namely Theorem 7 and Table 1, continue to hold albeit with probability  $1 - \alpha$ .

## C Background for malware detection case study

In this appendix, we provide background for our case study on malware detection, including motivation for studying certified robustness of malware detectors, a formulation of malware detection as a sequence classification problem, and a threat model for adversarial examples.

### C.1 Motivation

Malware (malicious software) detection is a vital capability for proactively defending against cyberattacks. Despite decades of progress, building and maintaining effective malware detection systems remains a challenge, as malware authors continually evolve their tactics to bypass detection and exploit new vulnerabilities. One technology that has led to advancements in malware detection, is the application of machine learning (ML), which is now used in many commercial systems [66, 43, 45, 46] and continues to be an area of interest in the malware research community [67, 68, 44, 49]. While traditional detection techniques rely on manually-curated signatures or detection rules, ML allows a detection model to be learned from a training corpus, that can potentially generalize to unseen programs.

Although ML has an apparent advantage in detecting previously unseen malware, recent research has shown that ML-based static malware detectors can be evaded by applying adversarial perturbations [18–20, 36, 50, 31, 51, 17, 38]. A variety of perturbations have been considered with different effects at the semantic level, however all of them can be modeled as inserting, deleting and/or substituting bytes. This prompts us to advance certified robustness for sequence classifiers within this general threat model—where an attacker can perform byte-level edits.

## C.2 Related work

Several empirical defense methods have been proposed to improve robustness of ML classifiers [60, 61]. Incer Romeo et al. [33] compose manually crafted Boolean features with a classifier that is constrained to be monotonically increasing with respect to selected inputs. This approach permits a combination of (potentially vulnerable) learned behavior with domain knowledge, and thereby aims to mitigate adversarial examples. Demontis et al. [60] show that the sensitivity of linear support vector machines to adversarial perturbations can be reduced by training with  $\ell_\infty$  regularization of weights. In another work, Quiring et al. [61] take advantage of heuristic-based semantic gap detectors and an ensemble of feature classifiers to improve empirical robustness. Compared to our work on certified adversarial defenses, these approaches do not provide formal guarantees.

*Binary normalization* [69–72] was originally proposed to defend against polymorphic/metamorphic malware, and can also be seen as a mitigation to certain adversarial examples. It attempts to sanitize binary obfuscation techniques by mapping malware to a canonical form before running a detection algorithm. However, binary normalization cannot fully mitigate attacks like *Disp* (see Table 9), as deducing opaque and evasive predicates are NP-hard problems [17].

Dynamic analysis can provide additional insights for malware detection. In particular, it can record a program’s behavior while executing it in a sandbox (e.g., collecting a call graph or network traffic) [73–77]. Though detectors built on top of dynamic analysis can be more difficult to evade, as the attacker needs to obfuscate the program’s behavior, they are still susceptible to adversarial perturbations. For example, an attacker may insert API calls to obfuscate a malware’s behavior [78–81]. Applying RS-Del to certify detectors that operate on call sequences [77] or more general dynamic features would be an interesting future direction.

## C.3 Static ML-based malware detection

We formulate malware detection as a sequence classification problem, where the objective is to classify a file in its raw byte sequence representation as malicious or benign. In the notation of Section 2, we assume the space of input sequences (files) is  $\mathcal{X} = \Omega^*$  where  $\Omega = \{0, 1, \dots, 255\}$  denotes the set of bytes, and we assume the set of classes is  $\mathcal{Y} = \{0, 1\}$  where 1 denotes the ‘malicious’ class and 0 denotes the ‘benign’ class. Within this context, a *malware detector* is simply a classifier  $f : \mathcal{X} \rightarrow \mathcal{Y}$ .

**Detector assumptions** Malware detectors are often categorized according to whether they perform static or dynamic analysis. Static analysis extracts information without executing code, whereas dynamic analysis extracts information by executing code and monitoring its behavior. In this work, we focus on machine learning-based static malware detectors, where the ability to extract and synthesize information is learned from data. Such detectors are suitable as base classifiers for RS-Del, as they can learn to make (weak) predictions for incomplete files where chunks of bytes are arbitrarily removed. We note that dynamic malware detectors are not compatible with RS-Del, since it is not generally possible to execute an incomplete file.

**Incorporating semantics** In Section 3.3, we noted that our methods are compatible with *sequence chunking* where the original input sequence is partitioned into chunks, and reinterpreted as a sequence of chunks rather than a sequence of lower-level elements. In the context of malware detection, we can partition a byte sequence into semantically meaningful chunks using information from a disassembler, such as Ghidra [82]. For example, a disassembler can be applied to a Windows executable to identify chunks of raw bytes that correspond to components of the header, machine instructions, raw data, padding etc. Applying our deletion smoothing mechanism at the level of semantic chunks, rather than raw bytes, may improve robustness as it excludes edits within chunks that may be semantically invalid. It also yields a different chunk-level edit distance certificate, that may cover a larger set of adversarial examples than a byte-level certificate of the same radius. Figure 3 illustrates the difference between byte-level and chunk-level deletion for a Windows executable, where chunks correspond to machine instructions (such as `push ebp`) or non-instructions (NI).

| Original file |      |                    | File under<br>byte-level deletion (BYTE) |      | File under<br>chunk-level deletion (INSN) |         |
|---------------|------|--------------------|------------------------------------------|------|-------------------------------------------|---------|
| File offset   | Byte | Instruction chunks | File offset                              | Byte | File offset                               | Chunk   |
| 00000000      | 77   | NI                 | 00000000                                 | 77   | 00000001                                  | 90      |
| 00000001      | 90   | NI                 | 00000002                                 | 144  | ⋮                                         | ⋮       |
| 00000002      | 144  | NI                 | ⋮                                        | ⋮    | 00000400                                  | 85      |
| ⋮             | ⋮    | ⋮                  | 00000400                                 | 85   | 00000401                                  | 139 236 |
| 00000400      | 85   | push ebp           | 00000403                                 | 131  | ⋮                                         | ⋮       |
| 00000401      | 139  | mov ebp, esp       | 00000404                                 | 236  | ⋮                                         | ⋮       |
| 00000402      | 236  |                    | ⋮                                        | ⋮    | ⋮                                         | ⋮       |
| 00000403      | 131  | sub esp, 5Ch       |                                          |      |                                           |         |
| 00000404      | 236  |                    |                                          |      |                                           |         |
| 00000405      | 92   |                    |                                          |      |                                           |         |
| ⋮             | ⋮    | ⋮                  |                                          |      |                                           |         |

Figure 3: Illustration of the deletion smoothing mechanism applied to an executable file at the byte-level versus chunk-level. *Left*: An executable file where the elementary byte sequence representation is shown in the 2nd column and chunks that correspond to machine instructions are shown in the 3rd column (sourced from the Ghidra [82] disassembler). Bytes that do not correspond to machine instructions are marked NI. Shading represents bytes (light gray) or instruction chunks (dark gray) that are deleted in the corresponding perturbed file to the right. *Middle*: A perturbed file produced by the deletion mechanism operating at the byte level (BYTE). Notice that individual instructions may be partially deleted. *Right*: A perturbed file produced by the deletion mechanism operating at the chunk-level (INSN).

#### C.4 Threat model

We next specify the modeled attacker’s goals, capabilities and knowledge for our malware detection case study [83].

**Attacker’s objective** We consider evasion attacks against a malware detector  $f : \mathcal{X} \rightarrow \mathcal{Y}$ , where the attacker’s objective is to transform an executable file  $x$  so that it is misclassified by  $f$ . To ensure the attacked file  $\bar{x}$  is useful after evading detection, we require that it is *functionally equivalent* to the original file  $x$ . We focus on evasion attacks that aim to misclassify a *malicious* file as *benign* in our experiments, as these attacks dominate prior work [51]. However, the robustness certificates derived in Section 4 also cover attacks in the opposite direction—where a *benign* file is misclassified as *malicious*.

**Attacker’s capability** We measure the attacker’s capability in terms of the number of elementary edits they make to the original file  $x$ . If the attacker is capable of making up to  $c$  elementary edits, then they can transform  $x$  into any file in the edit distance ball of radius  $c$  centred on  $x$ :

$$\mathcal{A}_c(x) = \{\bar{x} \in \mathcal{X} : \text{dist}_O(x, \bar{x}) \leq c\}.$$

Here  $\text{dist}_O(x, \bar{x})$  denotes the edit distance from the original file  $x$  to the attacked file  $\bar{x}$  under the set of edit operations (ops)  $O$ . We assume  $O$  consists of elementary byte-level or chunk-level deletions (del), insertions (ins) and substitutions (sub), or a subset of these operations.

We note that edit distance is a reasonable proxy for the cost of running evasion attacks that iteratively apply localized functionality-preserving edits (e.g., [19, 36, 37, 17, 38]). For these attacks, the edit distance scales roughly linearly with the number of attack iterations, and therefore the attacker has an incentive to minimize edit distance. While attacks do exist that make millions of elementary edits in the malware domain (e.g., [31]), we believe that an edit distance-constrained threat model is an important step towards realistic threat models for certified malware detection. (To examine the effect of large edits on robustness we include the *GAMMA* attack [31] in experiments covered in Appendix F.)

*Remark 9.* The set  $\mathcal{A}_c(x)$  *overestimates* the capability of an edit distance-constrained attacker, because it may include files that are not functionally equivalent to  $x$ . For example,  $\mathcal{A}_c(x)$  may include files that are not malicious (assuming  $x$  is malicious) or files that are invalid executables. This poses no problem for certification, since overestimating an attacker’s capability merely leads to a stronger certificate than required. Indeed, overestimating the attacker’s capability seem necessary, as functionally equivalent files are difficult to specify, let alone analyze.

Table 3: Summary of datasets.

| Dataset   | Label     | Number of samples |            |        |
|-----------|-----------|-------------------|------------|--------|
|           |           | Train             | Validation | Test   |
| Sleipnir2 | Benign    | 20 948            | 7 012      | 6 999  |
|           | Malicious | 20 768            | 6 892      | 6 905  |
| VTFeed    | Benign    | 111 258           | 13 961     | 13 926 |
|           | Malicious | 111 395           | 13 870     | 13 906 |

**Attacker’s knowledge** In our certification experiments in Appendix E, we assume the attacker has full knowledge of the malware detector and certification scheme. When testing published attacks in Appendix F, we consider both white-box and black-box access to the malware detector. In the black-box setting, the attacker may make an unlimited number of queries to the malware detector without observing its internal operation. We permit access to detection confidence scores, which are returned alongside predictions even in the black-box setting. In the white-box setting, the attacker can additionally inspect the malware detector’s source code. Such a strong assumption is needed for white-box attacks against neural network-based detectors that compute loss gradients with respect to the network’s internal representation of the input file [20, 17].

## D Experimental setup for malware detection case study

In this appendix, we detail the experimental setup for our malware detection case study.

### D.1 Datasets

Though our methods are compatible with executable files of any format, in our experiments we focus on the *Portable Executable (PE) format* [84], since datasets, malware detection models and adversarial attacks are more extensively available for this format. Moreover, PE format is the standard for executables, object files and shared libraries in the Microsoft Windows operating system, making it an attractive target for malware authors. We use two PE datasets which are summarized in Table 3 and described below.

**Sleipnir2** This dataset attempts to replicate data used in past work [53], which was not published with raw samples. We were able to obtain the raw malicious samples from a public malware repository called VirusShare [85] using the provided hashes. However, since there is no similar public repository for benign samples, we followed established protocols [86, 87, 20] to collect a new set of benign samples. Specifically, we set up a Windows 7 virtual machine with over 300 packages installed using Chocolatey package manager [88]. We then extracted PE files from the virtual machine, which were assumed benign,<sup>4</sup> and subsampled them to match the number of malicious samples. The dataset is randomly split into training, validation and test sets with a ratio of 60%, 20% and 20% respectively.

**VTFeed** This dataset was first used in recent attacks on end-to-end ML-based malware detectors [17]. It was collected from VirusTotal—a commercial threat intelligence service—by sampling PE files from the live feed over a period of two weeks in 2020. Labels for the files were derived from the 68 antivirus (AV) products aggregated on VirusTotal at the time of collection. Files were labeled *malicious* if they were flagged malicious by 40 or more of the AV products, they were labeled *benign* if they were not flagged malicious by any of the AV products, and any remaining files were excluded. Following Lucas et al. [17], the dataset is randomly split into training, validation and test sets with a ratio of 80%, 10%, and 10% respectively.

We note that VTFeed comes with strict terms of use, which prohibit us from loading it on our high performance computing (HPC) cluster. As a result, we use Sleipnir2 for comprehensive experiments (e.g., varying  $p_{\text{del}}$ ,  $\eta$ ) on the HPC cluster, and VTFeed for a smaller selection of experiments run on a local server.

<sup>4</sup>Chocolatey packages are validated against VirusTotal [89].

## D.2 Malware detection models

We experiment with malware detection models based on MalConv [47]. MalConv was one of the first *end-to-end* neural network models proposed for malware detection—i.e., it learns to classify directly from raw byte sequences, rather than relying on manually engineered features. Architecturally, it composes a learnable embedding layer with a shallow convolutional network. A large window size and stride of 500 bytes are employed to facilitate scaling to long byte sequences. Though MalConv is compatible with arbitrarily long byte sequences in principle, we truncate all inputs to 2MB to support training efficiency. We use the original parameter settings and training procedure [47], except where specified in Appendix D.5.

Using MalConv as a basis, we consider three models as described below.

**NS** A vanilla non-smoothed (NS) MalConv model. This model serves as a non-certified, non-robust baseline—i.e., no specific techniques are employed to improve robustness to evasion attacks and certification is not supported.

**RS-Abn** A smoothed MalConv model using the *randomized ablation* smoothing mechanism proposed by Levine and Feizi [24] and reviewed in Appendix I. This model serves as a certified robust baseline, albeit covering a more restricted threat model than the edit distance threat model we propose in Section 2. Specifically, it supports robustness certification for the Hamming distance threat model, where the adversary is limited to substitution edits ( $O = \{\text{sub}\}$ ). Since Levine and Feizi’s formulation is for images, several modifications are required to support malware detection as described in Appendix G. To improve convergence, we also apply gradient clipping when learning parameters in the embedding layer (see Appendix G). We consider variants of this model for different values of the ablation probability  $p_{\text{ab}}$ .

**RS-Del** A smoothed MalConv model using our proposed randomized deletion smoothing mechanism. This model supports robustness certification for the generalized edit distance threat model where  $O \subseteq \{\text{del}, \text{ins}, \text{sub}\}$ . We consider variants of this model for different values of the deletion probability  $p_{\text{del}}$ , decision thresholds  $\eta$ , and whether deletion/certification is performed at the byte-level (BYTE) or chunk-level (INSN). We perform chunking as illustrated in Figure 3—i.e., we chunk bytes that correspond to distinct machine instructions using the Ghidra disassembler.

## D.3 Controlling false positive rates

Malware detectors are typically tuned to achieve a low false positive rate (FPR) (e.g., less than 0.1–1%) since producing too many false alarms is a nuisance to users.<sup>5</sup> To make all malware detection models comparable, we calibrate the FPR to 0.5% on the test set for the experiments reported in Appendix E and 0.5% on the validation set for the experiments reported in Appendix F unless otherwise noted. This calibration is done by adjusting the decision threshold of the base MalConv model.

## D.4 Compute resources

Experiments for the Sleipnir2 dataset were run on a high performance computing (HPC) cluster, where the requested resources varied depending on the experiment. We generally requested a single NVIDIA P100 GPU when training and certifying models. Experiments for the VTFeed dataset were run on a local server due to restrictive terms of use. Compute resources and approximate wall clock running times are reported in Tables 4 and 5 for training and certification for selected parameter settings. Running times for other parameters settings are lower than the ones reported in these tables.

## D.5 Parameter settings

We specify the parameter settings and training procedure for MalConv, which is used standalone in NS, and as a base model for the smoothed models RS-Del and RS-Abn. Table 6 summarizes our setup, which is consistent across all three models except where specified. We follow the authors of MalConv [47] when setting parameters for the model and the optimizer, however we set a larger

<sup>5</sup><https://www.av-comparatives.org/testmethod/false-alarm-tests/>

Table 4: Compute resources used for training. Note that the wall clock times reported here are for an unoptimized implementation where the smoothing mechanism is executed on the CPU.

| Dataset   | Requested resources                                                    | Model  | Parameters                    | Time   | Notes                                          |
|-----------|------------------------------------------------------------------------|--------|-------------------------------|--------|------------------------------------------------|
| Sleipnir2 | 1 NVIDIA P100 GPU, 4 cores on Intel Xeon Gold 6326 CPU                 | NS     | –                             | 22 hr  | Trained for 50 epochs, converged in 15 epochs  |
|           |                                                                        | RS-Del | BYTE, $p_{\text{del}} = 95\%$ | 39 hr  | Trained for 100 epochs, converged in 50 epochs |
|           |                                                                        | RS-Del | INSN, $p_{\text{del}} = 95\%$ | 48 hr  | Trained for 100 epochs, converged in 20 epochs |
|           |                                                                        | RS-Abn | $p_{\text{ab}} = 95\%$        | 40 hr  | Trained for 100 epochs, converged in 90 epochs |
| VTFeed    | 1 NVIDIA RTX3090 GPU, 6 cores on AMD Ryzen Threadripper PRO 3975WX CPU | NS     | –                             | 139 hr | Trained for 100 epochs, converged in 25 epochs |
|           |                                                                        | RS-Del | BYTE, $p_{\text{del}} = 97\%$ | 152 hr | Trained for 100 epochs, converged in 20 epochs |

Table 5: Compute resources used for certification on the test set. The evaluation dataset is partitioned and processed on multiple compute nodes with the same specifications. The reported time is the sum of wall times on each compute node. Note that the times reported are for an unoptimized implementation where the smoothing mechanism is executed on the CPU.

| Dataset   | Requested resources                                                    | Model  | Parameters                    | Time   |
|-----------|------------------------------------------------------------------------|--------|-------------------------------|--------|
| Sleipnir2 | 1 NVIDIA P100 GPU, 12 cores on Intel Xeon Gold 6326 CPU                | NS     | –                             | 5 min  |
|           |                                                                        | RS-Del | BYTE, $p_{\text{del}} = 95\%$ | 65 hr  |
|           |                                                                        | RS-Del | INSN, $p_{\text{del}} = 95\%$ | 140 hr |
|           |                                                                        | RS-Abn | $p_{\text{ab}} = 95\%$        | 210 hr |
| VTFeed    | 1 NVIDIA RTX3090 GPU, 6 cores on AMD Ryzen Threadripper PRO 3975WX CPU | NS     | –                             | 4 min  |
|           |                                                                        | RS-Del | BYTE, $p_{\text{del}} = 97\%$ | 500 hr |

maximum input size of 2MiB to accommodate larger inputs without clipping. Due to differences in available GPU memory for the Sleipnir2 and VTFeed experiments, we use a larger batch size for VTFeed than for Sleipnir2. We also set a higher limit on the maximum number of epochs for VTFeed, as it is a larger dataset, although the NS and RS-Del models converge within 50 epochs for both datasets. To stabilize training for the smoothed models (RS-Del and RS-Abn), we modify the smoothing mechanisms during *training only* to ensure at least 500 raw bytes are preserved. This may limit the number of deletions for RS-Del and the number of ablated (masked) bytes for RS-Abn. For RS-Abn, we clip the gradients for the embedding layer to improve convergence (see Appendix G).

## E Evaluation of robustness certificates for malware detection

In this appendix, we evaluate the robustness guarantees and accuracy of RS-Del for malware detection. We consider two instantiations of the edit distance threat model. First, in Appendix E.1, we consider the Levenshtein distance threat model, where the attacker’s elementary edits are unconstrained and may include deletions, insertions and substitutions. Then, in Appendix E.2, we consider the more restricted Hamming distance threat model, where an attacker is only able to perform substitutions. We summarize our findings in Appendix E.3. Overall, we find that RS-Del generates robust predictions with minimal impact on model accuracy for the Levenshtein distance threat model, and outperforms RS-Abn [24] for the Hamming distance threat model.



Table 6: Parameter settings for MalConv, the optimizer and training procedure. Parameter settings are consistent across all malware detection models (NS, RS-Del, RS-Abn) except where specified.

|           | Parameter                   | Values                                              |
|-----------|-----------------------------|-----------------------------------------------------|
| MalConv   | Max input size              | 2097152                                             |
|           | Embedding size              | 8                                                   |
|           | Window size                 | 500                                                 |
|           | Channels                    | 128                                                 |
| Optimizer | Python class                | <code>torch.optim.SGD</code>                        |
|           | Learning rate               | 0.01                                                |
|           | Momentum                    | 0.9                                                 |
|           | Weight decay                | 0.001                                               |
| Training  | Batch size                  | 24 (Sleipnir2), 32 (VTFeed)                         |
|           | Max. epoch                  | 50 (Sleipnir2), 100 (VTFeed)                        |
|           | Min. preserved bytes        | 500 (RS-Del, RS-Abn), NA (NS)                       |
|           | Embedding gradient clipping | 0.5 (RS-Abn), $\infty$ (RS-Del, NS)                 |
|           | Early stopping              | If validation loss does not improve after 10 epochs |

We report the following quantities in our evaluation:

- *Certified radius (CR)*. The radius of the largest robustness certificate that can be issued for a given input, model and certification method. Note that this is a conservative measure of robustness since it is *tied to the certification method*. The *median CR* is reported on the test set.
- *Certified accuracy* [13, 14], also known as *verified-robust accuracy* [63, 54], evaluates robustness certificates and accuracy of a model simultaneously with respect to a test set. It is defined as the fraction of instances in the test set  $\mathbb{D}$  for which the model  $f$ ’s prediction is correct *and* certified robust at radius  $r$  or greater:

$$\text{CERTACC}_r(\mathbb{D}) = \sum_{(\mathbf{x}, y) \in \mathbb{D}} \frac{\mathbf{1}_{f(\mathbf{x})=y} \mathbf{1}_{\text{CR}(\mathbf{x}) \geq r}}{|\mathbb{D}|} \quad (22)$$

where  $\text{CR}(\mathbf{x})$  denotes the certified radius for input  $\mathbf{x}$  returned by the certification method.

- *Clean accuracy*. The fraction of instances in the test set for which the model’s prediction is correct.

We briefly mention default parameter settings for the experiments presented in this appendix. When approximating the smoothed models (RS-Del and RS-Abn) we sample  $n_{\text{pred}} = 1000$  perturbed inputs for prediction and  $n_{\text{bnd}} = 4000$  perturbed inputs for certification, while setting the significance level  $\alpha$  to 0.05. Unless otherwise specified, we set the decision thresholds for the smoothed models so that  $\eta = 0$ . After fixing  $\eta$ , the decision thresholds for the base models are tuned to yield a false positive rate of 0.5%. We note that the entire test set is used when reporting metrics and summary statistics in this appendix.

### E.1 Levenshtein distance threat model

We first present results for the Levenshtein distance threat model, where the attacker’s elementary edits are unconstrained ( $O = \{\text{del}, \text{ins}, \text{sub}\}$ ). We vary three parameters associated with RS-Del: the deletion probability  $p_{\text{del}}$ , the decision thresholds of the smoothed model  $\eta$ , and the level of sequence chunking (i.e., whether sequences are chunked at the byte-level or instruction-level). We use NS as a baseline as there are no prior certified defenses for the Levenshtein distance threat model to our knowledge.

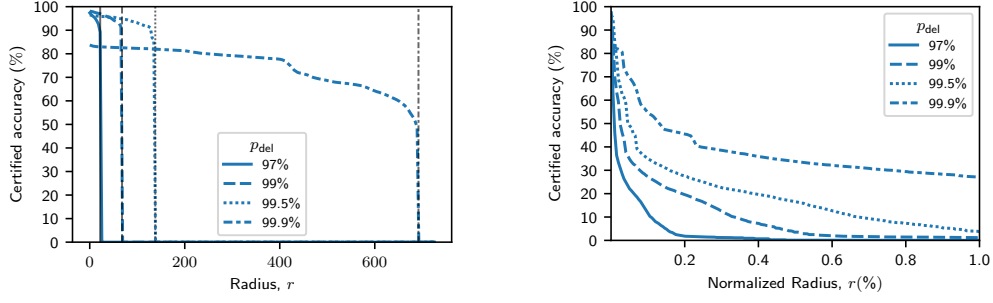

Figure 4: Certified accuracy for RS-Del as a function of the radius in bytes (left horizontal axis), radius normalized by file size (right horizontal axis) and byte deletion probability  $p_{del}$  (line styles). The results are plotted for the Sleipnir2 test set under the byte-level Levenshtein distance threat model (with  $O = \{\text{del, ins, sub}\}$ ). The grey vertical lines in the left plot represent the best achievable certified radius for RS-Del (setting  $\mu_y = 1$  in the expressions in Table 1).

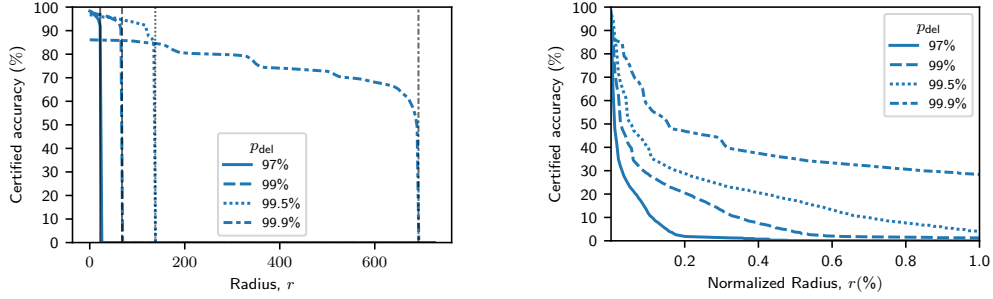

Figure 5: Certified accuracy for RS-Del with chunk-level deletion (INSN) as a function of the radius in chunks (left horizontal axis), radius normalized by sequence length in chunks (right horizontal axis) and chunk deletion probability  $p_{del}$  (line styles). The results are plotted for the Sleipnir2 test set under the chunk-level Levenshtein distance threat model (with  $O = \{\text{del, ins, sub}\}$ ). The grey vertical lines in the left plot represent the best achievable certified radius for RS-Del (setting  $\mu_y = 1$  in the expressions in Table 1).

**Certified accuracy** Figure 4 plots the certified accuracy of RS-Del using byte-level deletion as a function of the radius (left horizontal axis), radius normalized by file size (right horizontal axis) on the Sleipnir2 dataset for several values of  $p_{del}$ . We observe that the curves for larger values of  $p_{del}$  approximately dominate the curves for smaller values of  $p_{del}$ , for  $p_{del} \leq 99.5\%$  (i.e., the accuracy is higher or close for all radii). This suggests that the robustness of RS-Del can be improved without sacrificing accuracy by increasing  $p_{del}$  up to 99.5%. However, for the larger value  $p_{del} = 99.9\%$ , we observe a drop in certified accuracy of around 10% for smaller radii and an increase for larger radii. By normalizing with respect to the file size, we can see that our certificate is able to certify up to 1% of the file size. We also include an analogous plot for chunk-level deletion in Figure 5 which demonstrates similar behavior. We note that chunk-level deletion arguably provides stronger guarantees, since the effective radius for chunk-level Levenshtein distance is larger than for byte-level Levenshtein distance.

It is interesting to relate these certification results to published evasion attacks. Figure 4 shows that we can achieve a certified accuracy in excess of 90% at a Levenshtein distance radius of 128 bytes when  $p_{del} = 99.5\%$ . This radius is larger than the median Levenshtein distance of two attacks that manipulate headers of PE files [36, 37] (see Table 9 in Appendix F). We can therefore provide reasonable robustness guarantees against these two attacks. However, a radius of 128 bytes is orders of magnitude smaller than the median Levenshtein distances of other published attacks which range from tens of KB [17, 20] to several MB [31] (also reported in Table 9). While some of these attacks

Table 7: Clean accuracy and robustness metrics for RS-Del as a function of the dataset (Sleipnir2 and VTFeed), deletion probability  $p_{\text{del}}$  and deletion level (BYTE or INSN). All metrics are computed on the test set. Here “abstain rate” refers to the fraction of test instances for which RS-Del abstains (line 7 in Figure 1), and “UB” refers to an upper bound on the median CR for a best case smoothed model (based on Table 1 with  $\mu_y = 1$ ). A good tradeoff is achieved when  $p_{\text{del}} = 99.5\%$  for both the byte-level (BYTE) and chunk-level (INSN) certificates (highlighted in bold face below).

| Dataset   | Model  | Parameters                      | Clean accuracy<br>(Abstain rate) % | Median CR<br>(UB) | Median<br>NCR % |
|-----------|--------|---------------------------------|------------------------------------|-------------------|-----------------|
| Sleipnir2 | NS     | —                               | 98.9 —                             | — —               | —               |
|           | RS-Del | BYTE, $p_{\text{del}} = 90\%$   | 97.1 (0.2)                         | 6 (6)             | 0.0023          |
|           |        | BYTE, $p_{\text{del}} = 95\%$   | 97.8 (0.0)                         | 13 (13)           | 0.0052          |
|           |        | BYTE, $p_{\text{del}} = 97\%$   | 97.4 (0.1)                         | 22 (22)           | 0.0093          |
|           |        | BYTE, $p_{\text{del}} = 99\%$   | 98.1 (0.1)                         | 68 (68)           | 0.0262          |
|           |        | BYTE, $p_{\text{del}} = 99.5\%$ | <b>96.5 (0.2)</b>                  | <b>137 (138)</b>  | <b>0.0555</b>   |
|           |        | BYTE, $p_{\text{del}} = 99.9\%$ | 83.7 (3.4)                         | 688 (692)         | 0.2269          |
|           |        | INSN, $p_{\text{del}} = 90\%$   | 97.9 (0.1)                         | 6 (6)             | 0.0026          |
|           |        | INSN, $p_{\text{del}} = 95\%$   | 97.8 (0.1)                         | 13 (13)           | 0.0056          |
|           |        | INSN, $p_{\text{del}} = 97\%$   | 98.3 (0.0)                         | 22 (22)           | 0.0095          |
|           |        | INSN, $p_{\text{del}} = 99\%$   | 97.6 (0.1)                         | 68 (68)           | 0.0292          |
|           |        | INSN, $p_{\text{del}} = 99.5\%$ | <b>96.8 (0.2)</b>                  | <b>137 (138)</b>  | <b>0.0589</b>   |
|           |        | INSN, $p_{\text{del}} = 99.9\%$ | 86.1 (0.2)                         | 689 (692)         | 0.2982          |
| VTFeed    | NS     | —                               | 98.9 —                             | — —               | —               |
|           | RS-Del | BYTE, $p_{\text{del}} = 97\%$   | 92.1 (0.9)                         | 22 (22)           | 0.0045          |
|           |        | BYTE, $p_{\text{del}} = 99\%$   | 86.9 (0.8)                         | 68 (68)           | 0.0122          |

arguably fall outside an edit distance constrained threat model, we consider them in our empirical evaluation of robustness in Appendix F.

**Clean accuracy and abstention rates** Table 7 reports clean accuracy for RS-Del and the non-certified NS baseline. It also reports abstention rates for RS-Del, the median certified radius (CR), and the median certified radius normalized by file size (NCR). We find that clean accuracy for Sleipnir2 follows similar trends as certified accuracy: it is relatively stable for  $p_{\text{del}}$  in the range 90–99.5%, but drops by more than 10% at  $p_{\text{del}} = 99.9\%$ . We note that the clean accuracy of RS-Del (excluding  $p_{\text{del}} = 99.9\%$ ) is at most 3% lower than the NS baseline for Sleipnir2 and at most 7% lower than the NS baseline for VTFeed. We observe minimal differences in the results for chunk-level (INSN) and byte-level (BYTE) deletion smoothing, but note that the effective CR is larger for chunk-level smoothing, since each chunk may contain several bytes.

**Accuracy under high deletion** It may be surprising that RS-Del can maintain high accuracy even when deletion is aggressive. We offer some possible explanations. First, we note that even with a high deletion probability of  $p_{\text{del}} = 99.9\%$ , the smoothed model accesses almost all of the file in expectation, as it aggregates  $n_{\text{pred}} = 1000$  predictions from the base model each of which accesses a random 0.1% of the file in expectation. Second, we posit that malware detection may be “easy” for RS-Del on these datasets. This could be due to the presence of signals that are robust to deletion (e.g., file size or byte frequencies) or redundancy of signals (i.e., if a signal is deleted in one place it may be seen elsewhere).

**Decision threshold** We demonstrate how the decision thresholds  $\eta$  introduced in Section 3.1 can be used to trade off certification guarantees between classes. We consider normalized decision thresholds where  $\sum_y \eta_y = 1$  and  $\eta_y \in [0, 1]$ . We only specify the value of  $\eta_1$  when discussing our results, noting that  $\eta_0 = 1 - \eta_1$  in our two-class setting.

Table 8 provides error rates and robustness metrics for several values of  $\eta_1$ , using byte-level Levenshtein distance with  $p_{\text{del}} = 99.5\%$ . When varying  $\eta_1$ , we also vary the decision threshold of the base model to achieve a target false positive rate (FPR) of 0.5%. Looking at the table, we see that  $\eta_1$  has minimal impact on the false negative rate (FNR), which is stable around 7%. However, there

Table 8: Impact of the smoothed decision threshold  $\eta_1$  on false negative error rate (FNR) and median certified radius (CR) for malicious and benign files. The false positive rate (FPR) is set to a target value of 0.5% by varying the decision threshold of the base model. The results are reported for Sleipnir2 with  $p_{\text{del}} = 99.5\%$  using byte-level Levenshtein distance. “UB” refers to an upper bound on the median CR for a best case smoothed model (based on Table 1 with  $\mu_y = 1$ ).

| $\eta_1$ (%) | FNR (%) | FPR (%) | Median CR (UB) |           |
|--------------|---------|---------|----------------|-----------|
|              |         |         | Malicious      | Benign    |
| 50           | 6.8     | 0.5     | 137 (138)      | 137 (138) |
| 25           | 6.9     | 0.5     | 275 (276)      | 57 (57)   |
| 10           | 6.8     | 0.5     | 455 (459)      | 20 (21)   |
| 5            | 6.6     | 0.5     | 578 (597)      | 10 (10)   |
| 1            | 7.1     | 0.5     | 582 (918)      | 1 (2)     |
| 0.5          | 6.9     | 0.5     | 506 (1057)     | 0 (0)     |

is a significant impact on the median CR (and theoretical upper bound), as reported separately for each class. The median CR is balanced for both the malicious and benign class when  $\eta_1 = 50\%$ , but favours the malicious class as  $\eta_1$  is decreased. For instance when  $\eta_1 = 5\%$  a significantly larger median CR is possible for malicious files (137 to 578) at the expense of the median CR for benign files (137 to 10). This asymmetry in the class-specific CR is a feature of the theory—that is, in addition to controlling a tradeoff between error rates of each class,  $\eta_1$  also controls a tradeoff between the CR for each class (see Table 1).

Figure 6 plots the certified true positive rate (TPR) and true negative rate (TNR) of RS-Del on the Sleipnir2 dataset for several values of  $\eta_1$ . The certified TPR and TNR can be interpreted as class-specific analogues of the certified accuracy. Concretely, the certified TPR (TNR) at radius  $r$  is the fraction of malicious (benign) instances in the test set for which the model’s prediction is correct *and* certified robust at radius  $r$ . The certified TPR and TNR jointly measure accuracy and robustness and complement the metrics reported in Table 8. Looking at Figure 6, we see that the certified TNR curves drop more rapidly to zero than the certified TPR curves as  $\eta_1$  decreases. Again, this suggests decreasing  $\eta_1$  sacrifices the certified radii of benign instances to increase the certified radii of malicious instances. We note that the curves for  $\eta_1 = 50\%$  correspond to the same setting as the certified accuracy curve in Figure 4 (with  $p_{\text{del}} = 99.5\%$ ).

## E.2 Hamming distance threat model

We now turn to the more restricted Hamming distance threat model, where the attacker is limited to performing substitutions only ( $O = \{\text{sub}\}$ ). We choose to evaluate this threat model as it is covered in previous work on randomized smoothing, called *randomized ablation* [24] (abbreviated RS-Abn), and can serve as a baseline for comparison with our method. Recall that we adapt RS-Abn for malware detection by introducing a parameter called  $p_{\text{ab}}$ , which is the fraction of bytes that are “ablated” (replaced by a special masked value) (see Appendix D.2). This parameter is analogous to  $p_{\text{del}}$  in RS-Del, except that the number of ablated bytes is deterministic in RS-Abn, whereas the number of deleted bytes is random in RS-Del. We compare RS-Del and RS-Abn for varying values of  $p_{\text{del}}$  and  $p_{\text{ab}}$  using the Sleipnir2 dataset and byte-level Hamming distance.

**Certified accuracy** Figure 2 plots the certified accuracy of RS-Del and RS-Abn for three values of  $p_{\text{del}}$  and  $p_{\text{ab}}$ . We observe that the certified accuracy is uniformly larger for our proposed method RS-Del than for RS-Abn when  $p_{\text{del}} = p_{\text{ab}}$ . The superior certification performance of RS-Del is somewhat surprising given it is not optimized for the Hamming distance threat model. One possible explanation relates to the learning difficulty of RS-Abn compared with RS-Del. Specifically, we find that stochastic gradient descent is slower to converge for RS-Abn despite our attempts to improve convergence (see Appendix G). Recall, that RS-Del provides certificates for any of the threat models in Table 1—in addition to the Hamming distance certificate—without needing to modify the smoothing mechanism.

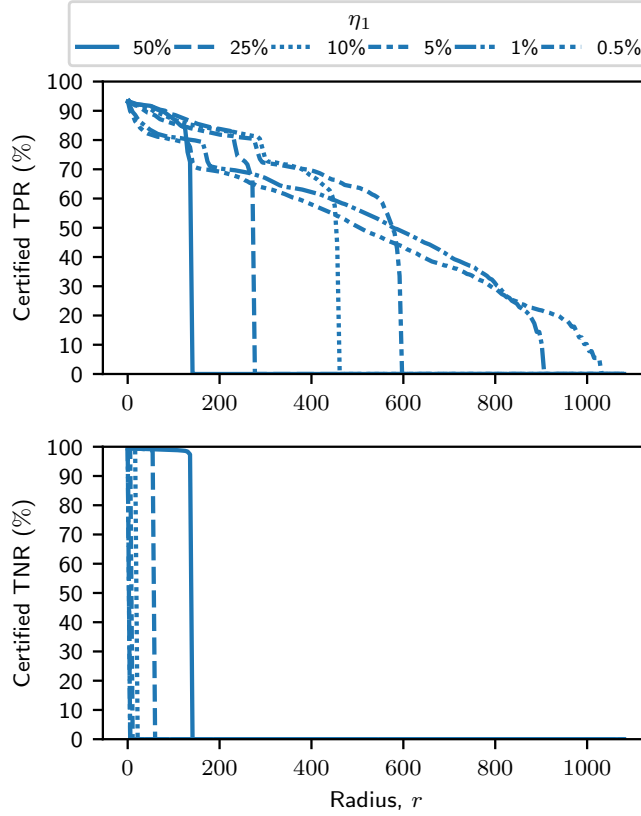

Figure 6: Certified true positive rate (TPR) and true negative rate (TNR) of RS-Del as a function of the certificate radius  $r$  (horizontal axis) and the decision threshold  $\eta_1$  (line style). The results are plotted for the Sleipnir2 test set for byte-level deletion (BYTE) with  $p_{\text{del}} = 99.5\%$  under the Levenshtein distance threat model (with  $O = \{\text{del, ins, sub}\}$ ). It is apparent that  $\eta_1$  controls a tradeoff in the certified radius between the malicious (measured by TPR) and benign (measured by TNR) classes. Note that in this setting, a non-smoothed, non-certified model (NS) achieves a clean TPR and TNR of 98.2% and 99.5% respectively.

**Tightness** RS-Abn is provably tight, in the sense that it is not possible to issue a larger Hamming distance certificate unless more information is made available to the certification mechanism or the ablation smoothing mechanism is changed. This tightness result for RS-Abn, together with the empirical results in Figure 2, suggests that RS-Del produces certificates which are tight or close to tight in practice, at least for the Hamming distance threat model. This is an interesting observation, since it is unclear how to derive a tight, computationally tractable certificate for RS-Del.

### E.3 Summary

Our evaluation shows that RS-Del provides non-trivial robustness guarantees with a low impact on accuracy. The certified radii we observe are close to the best radii theoretically achievable using our mechanism. For the Levenshtein byte-level edit distance threat model, we obtain radii of a few hundred bytes in size, which can certifiably defend against attacks that edit headers of PE files [36, 37, 51]. However, certifying robustness against more powerful attacks that modify thousands or millions of bytes remains an open challenge. By varying the detection threshold, we show that certification can be performed asymmetrically for benign and malicious instances. This can boost the certified radii of malicious instances by a factor of 4 in some cases. While there are no prior methods to use as baselines for the Levenshtein distance threat model, our comparisons with RS-Abn [24] for

the Hamming distance threat model show that RS-Del outperforms RS-Abn in terms of both accuracy and robustness.

## F Evaluation of robustness to published attacks

In this appendix, we empirically evaluate the robustness of RS-Del to several published evasion attacks. By doing so, we aim to provide a more complete picture of robustness, as our certificates are conservative and may *underestimate* robustness to real attacks, which are subject to additional constraints (e.g., maintaining executability, preserving a malicious payload, etc.). We introduce the attacks in Appendix F.1, provide details of the experimental setup in Appendix F.2 and discuss the results in Appendix F.3.

### F.1 Attacks covered

Table 9: Evasion attacks used in our evaluation. The *attack distance* refers to the median Levenshtein distance computed on a set of 500 attacked files from the Sleipnir2 test set. We use a closed source implementation of *Disp* and open source implementations of the remaining attacks based on `secml-malware` [90].

| Attack             | Supported settings   | Attack distance | Optimizer                     | Description                                                                                                                           |
|--------------------|----------------------|-----------------|-------------------------------|---------------------------------------------------------------------------------------------------------------------------------------|
| <i>Disp</i> [17]   | White-box, black-box | 17.2 KB         | Gradient-guided               | Disassembles the PE file and displaces chunks of code to a new section, replacing the original code with semantic nops.               |
| <i>Slack</i> [20]  | White-box            | 34.7 KB         | Fast Gradient Sign Method [2] | Replaces non-functional bytes in slack regions or the overlay of the PE file with adversarially-crafted noise.                        |
| <i>HDOS</i> [36]   | White-box, black-box | 58.0 B          | Genetic algorithm             | Manipulates bytes in the DOS header of the PE file which are not used in modern Windows.                                              |
| <i>HField</i> [37] | White-box, black-box | 17.0 B          | Genetic algorithm             | Manipulates fields in the header of the PE file (debug information, section names, checksum, etc.) which do not impact functionality. |
| <i>GAMMA</i> [31]  | Black-box            | 2.10 MB         | Genetic algorithm             | Appends sections extracted from benign files to the end of a malicious PE file and modifies the header accordingly.                   |

We consider five recently published attacks designed for evading static PE malware detectors as summarized in Table 9. The attacks cover a variety of edit distance magnitudes from tens of bytes to millions of bytes. While attacks that edit millions of bytes arguably fall outside our edit distance-constrained threat model, we include one such attack (*GAMMA*) to test the limits of our methodology. We note that four of the five attacks are able to operate in a black-box setting and can therefore be applied directly to RS-Del. However, the white-box attacks are designed for neural network malware detectors with a specific architecture. In particular, they assume the network receives a raw byte sequence as input, that the initial layer is an embedding layer, and that gradients can be computed with respect to the output of the embedding layer. Although these architectural assumptions are satisfied by the base MalConv model, they are not satisfied by RS-Del, because additional operations are applied before the embedding layer and the aggregation of base model predictions is not differentiable. In Appendix H, we adapt the white-box attacks for RS-Del by applying two tricks: (1) we apply the smoothing mechanism *after* the embedding layer, and (2) we replace majority voting with soft aggregation following Salman et al. [91].

Table 10: Success rates of direct attacks against RS-Del and the NS baseline. A lower success rate is better from our perspective as a defender, as it means the model is more robust to the attack. The model that achieves the lowest success rate for each attack/dataset is highlighted in boldface.

| Setting   | Attack             | Dataset   | Attack success rate (%) |             |
|-----------|--------------------|-----------|-------------------------|-------------|
|           |                    |           | NS                      | RS-Del      |
| White-box | <i>Disp</i> [17]   | Sleipnir2 | 73.8                    | <b>56.7</b> |
|           |                    | VTFeed    | 94.1                    | <b>74.5</b> |
|           | <i>Slack</i> [20]  | Sleipnir2 | <b>57.9</b>             | 85.3        |
|           |                    | VTFeed    | 96.0                    | <b>43.9</b> |
| Black-box | <i>HDOS</i> [36]   | Sleipnir2 | 0.0                     | 0.0         |
|           |                    | VTFeed    | 0.0                     | 0.0         |
|           | <i>HField</i> [37] | Sleipnir2 | 0.607                   | <b>0.0</b>  |
|           |                    | VTFeed    | 0.990                   | <b>0.0</b>  |
|           | <i>Disp</i> [17]   | Sleipnir2 | 0.809                   | <b>0.0</b>  |
|           |                    | VTFeed    | 10.9                    | <b>0.0</b>  |
|           | <i>GAMMA</i> [31]  | Sleipnir2 | 99.2                    | <b>54.1</b> |
|           |                    | VTFeed    | <b>76.2</b>             | 100.0       |

## F.2 Experimental setup

Since some of the attacks take hours to run for a single file, we use smaller evaluation sets containing malware subsampled from the test sets in Table 3. The evaluation set we use for Sleipnir2 consists of 500 files, and the one for VTFeed consists of 100 files (matching [17]). We note that our evaluation sets are comparable in size to prior work [18, 20, 50]. For each evaluation set, we report attack success rates against malware detectors trained on the same dataset.

Since all attacks employ greedy optimization with randomization, they may fail on some runs, but succeed on others. We therefore repeat each attack 5 times per file and use the best performing attacked file in our evaluation. We define the attack success rate as the proportion of files initially detected as malicious for which at least one of the 5 attack repeats is successful at evading detection. Lower attack success rates correlate with improved robustness against attacks. We permit all attacks to run for up to 200 attack iterations of the internal optimizer. Early stopping is enabled for those attacks that support it (*Disp*, *Slack*, *GAMMA*), which means the attack terminates as soon as the model’s prediction flips from malicious to benign.

Where possible, we run *direct attacks* against RS-Del and compare success rates against NS as a baseline. We also consider *transfer attacks* from NS to RS-Del as an important variation to the threat model, where an attacker has limited access to the target RS-Del during attack optimization. When running direct attacks against RS-Del, we use a reduced number of Monte Carlo samples ( $n_{\text{pred}} = 100$ ) to make the computational cost of the attacks more manageable. For both direct and transfer attacks against RS-Del, we set  $p_{\text{del}} = 97\%$  and perform deletion and certification at the byte-level (BYTE).

## F.3 Results

The results for direct attacks against RS-Del are presented in Table 10. For both the Sleipnir2 and VTFeed datasets, we observe that the robustness of RS-Del is superior (or equal) to NS against four of the six attacks. The two cases where RS-Del’s robustness drops compared to NS are for the strongest attacks: *Slack* and *GAMMA*. The results for transfer attacks from NS to RS-Del are presented in Table 11. Almost all of the attacks transfer poorly to RS-Del. In most cases the attack success rates drop to zero or single digit percentages. We hypothesize that *Slack* and *GAMMA* make such drastic changes to the original binary that they can overwhelm the malicious signal—enough to cross the decision boundary—akin to a good word attack [92]. We find that *HDOS* and *HField* are ineffective for both RS-Del and the baseline NS. Both attacks change up to 58 bytes in the header, and tend to fall within our certifications.

Table 11: Success rates of attacks transferred from NS to RS-Del.

| Setting   | Attack             | Dataset   | Attack success rate (%) |        |
|-----------|--------------------|-----------|-------------------------|--------|
|           |                    |           | NS                      | RS-Del |
| White-box | <i>Disp</i> [17]   | Sleipnir2 | 73.8                    | 0.414  |
|           |                    | VTFeed    | 94.1                    | 0.0    |
|           | <i>Slack</i> [20]  | Sleipnir2 | 57.9                    | 2.90   |
|           |                    | VTFeed    | 96.0                    | 1.01   |
| Black-box | <i>HDOS</i> [36]   | Sleipnir2 | 0.0                     | 0.0    |
|           |                    | VTFeed    | 0.0                     | 0.0    |
|           | <i>HField</i> [37] | Sleipnir2 | 0.607                   | 0.0    |
|           |                    | VTFeed    | 0.990                   | 0.0    |
|           | <i>Disp</i> [17]   | Sleipnir2 | 0.607                   | 0.0    |
|           |                    | VTFeed    | 10.9                    | 0.0    |
|           | <i>GAMMA</i> [31]  | Sleipnir2 | 99.2                    | 99.6   |
|           |                    | VTFeed    | 76.2                    | 100.0  |

## G Efficiency of RS-Del

In this appendix, we discuss the training and computational efficiency of RS-Del. We provide comparisons with RS-Abn [24], which serves as a baseline in Appendix E.2 for a more restricted Hamming distance threat model.

**Computational efficiency** Table 12 reports wall clock times for training and prediction. For training, we measure the time taken to complete 1 epoch of stochastic gradient descent on the Sleipnir2 training set, where inputs are perturbed by the smoothing mechanism. For prediction, we measure the time taken for a single 1MB input file using  $n_{\text{pred}} = 1000$  Monte Carlo samples. We split the prediction time into two components: (1) the time taken to generate perturbed inputs from the smoothing mechanism and (2) the time taken to aggregate predictions for the perturbed inputs using the base MalConv model. All times are recorded on a desktop PC fitted with an AMD Ryzen 7 5800X CPU and an NVIDIA RTX3090 GPU, using our PyTorch implementation of RS-Del and RS-Abn. We execute training and prediction for the base model on the GPU, and the smoothing mechanism on the CPU. We use a single PyTorch process, noting that times may be improved by running the smoothing mechanism in parallel or on the GPU.

We now make some observations about the results. First, we note that training is an order of magnitude faster for RS-Del compared with RS-Abn. We attribute this speed-up to the deletion smoothing mechanism of RS-Del, which drastically reduces the dimensionality of inputs, thereby reducing the time taken to perform forward and backward passes for the base model. On the contrary, the ablation smoothing mechanism of RS-Abn does not alter the dimensionality of inputs, so it does not have a performance advantage in this respect. Second, we observe that the total prediction time for RS-Del is approximately 150% faster than for RS-Abn. We expect this difference is also due to the effect of dimensionality reduction for the deletion smoothing mechanism.

**Training efficiency** Training curves for the base MalConv models used in RS-Del and RS-Abn are provided in Figure 7 for the Sleipnir2 dataset. Due to convergence issues for RS-Abn, we adapted training to incorporate gradient clipping when updating the embedding layer. This addresses imbalance in the gradients arising from the dominance of masked (ablated) values in the perturbed inputs. However, even with this fix, we observe slower convergence to a higher loss value for RS-Abn than for RS-Del. Combining the results of Table 12 and Figure 7, we conclude that RS-Abn beats RS-Del in terms of training efficiency as it requires both fewer epochs to converge and takes less time per epoch.



Table 12: Comparison of runtime efficiency for two models: RS-Del (our method with byte-level deletion) and RS-Abn [24]. The first column of wall times measures the time taken to train each model for one epoch on Sleipnir2. The second and third columns of wall times measure the time taken to make a prediction for a 1MB input file. This is split into two components: the time taken to generate  $n_{\text{pred}} = 1000$  perturbed inputs from the smoothing mechanism (second column) and the time taken to pass the perturbed inputs through the base model (third column).

| Model       | Parameters              | Wall time (s) |           |            |
|-------------|-------------------------|---------------|-----------|------------|
|             |                         | Train 1 epoch | Predict   |            |
|             |                         |               | Smoothing | Base model |
| RS-Del      | $p_{\text{del}} = 90\%$ | 354           | 10.42     | 0.070      |
| RS-Abn [24] | $p_{\text{ab}} = 90\%$  | 1692          | 15.29     | 0.352      |
| RS-Del      | $p_{\text{del}} = 99\%$ | 329           | 8.79      | 0.043      |
| RS-Abn [24] | $p_{\text{ab}} = 99\%$  | 1788          | 15.60     | 0.352      |

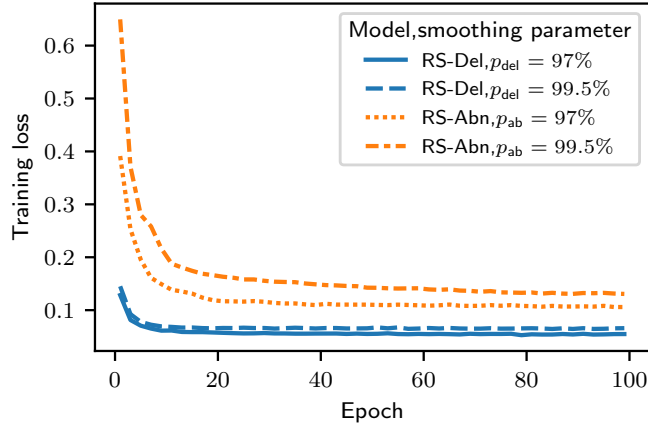

Figure 7: Training curves for RS-Del (our method with byte-level deletion) and RS-Abn [24] for the Sleipnir2 dataset.

## H Adapting attacks for smoothed classifiers

In this appendix, we show how to adapt gradient-guided white-box attacks to account for randomized smoothing.

We consider a generic family of white-box attacks that operate on neural network-based classifiers, where the first layer of the network is an embedding layer. Mathematically, we assume the classifier under attack  $f$  can be decomposed as

$$f = f_{\text{embed}} \circ f_{\text{soft}} \circ f_{\text{pred}} \quad (23)$$

where

- $f_{\text{embed}}$  is the embedding layer, which maps an input sequence  $\mathbf{x} \in \mathcal{X}$  of length  $n = |\mathbf{x}|$  to an  $n \times d$  array of  $d$ -dimensional embedding vectors;
- $f_{\text{soft}}$  represents the subsequent layers in the network, which map an  $n \times d$  embedding array to a probability distribution over classes  $\mathcal{Y}$ ; and
- $f_{\text{pred}}$  is an optional final layer, which maps a probability distribution over classes to a prediction (e.g., by taking the  $\arg \max$  or applying a threshold).

The attack may query any of the above components in isolation and compute gradients of  $f_{\text{soft}}$ . For instance, the attacks we consider [20, 36, 17] optimize the input in the embedding space  $e \in \mathbb{R}^{n \times d}$ , by computing the gradient  $\frac{\partial f_{\text{soft}}(e)}{\partial e}$ .

While the above setup covers attacks against MalConv, or classifiers with similar architectures, it is not directly compatible with smoothed classifiers. There are two incompatibilities. First, a direct implementation of a smoothed classifier (as described in Section 3.1 and Figure 1) does not decompose like (23). And second, the aggregation of hard predictions from the base classifiers is non-differentiable. We explain how to address these incompatibilities below.

**Leveraging commutativity** Consider a smoothed classifier composed from a base classifier  $h$  and smoothing mechanism  $\phi$ , and suppose the base classifier decomposes as in (23). Following Section 3.1 and Figure 1, the smoothed classifier’s confidence score for class  $y$  can be expressed as

$$p_y(\mathbf{x}) = \text{smooth}_N(\mathbf{x}; \phi, h_{\text{embed}} \circ h_{\text{soft}} \circ h_{\text{pred}} \circ \mathbf{1}_{\square=y}) \quad (24)$$

where

$$\text{smooth}_N(\mathbf{x}; \phi, f) = \frac{1}{N} \sum_{i=1}^N f(z_i), \quad \text{with } z_i \sim \phi(\mathbf{x})$$

is the (empirical) smoothing operation. This expression does not immediately decompose like (23), because the embedding layer is applied to the perturbed input  $\phi(\mathbf{x})$ , not  $\mathbf{x}$ . Fortunately, we can manipulate the expression into the desired form by swapping the order of  $\phi$  and  $h_{\text{embed}}$ . To do so, we extend the definition of  $\phi$  to operate on an embedding array so that  $h_{\text{embed}}(\phi(\mathbf{x})) = \phi(h_{\text{embed}}(\mathbf{x}))$ , i.e.,  $\phi$  and  $h_{\text{embed}}$  commute. In particular, this can be done for randomized deletion (RS-Del) by applying the deletion edits to embedding vectors along the first dimension. Then (24) can equivalently be expressed as

$$p_y(\mathbf{x}) = \underbrace{h_{\text{embed}}}_{f_{\text{embed}}} \circ \underbrace{\text{smooth}_N(\phi, h_{\text{soft}} \circ h_{\text{pred}} \circ \mathbf{1}_{\square=y})}_{f_{\text{soft}}}(\mathbf{x}). \quad (25)$$

**Soft aggregation** While (25) decomposes as required, the  $f_{\text{soft}}$  component is not differentiable. This is due to the presence of  $h_{\text{pred}}$ , which is an arg max layer. To proceed, we replace the aggregation of predictions by the aggregation of softmax scores as proposed by Salman et al. [91]. This yields a differentiable approximation of the smoothed classifier:

$$p_y(\mathbf{x}) \approx \underbrace{h_{\text{embed}}}_{f_{\text{embed}}} \circ \underbrace{\text{smooth}_N(\phi, h_{\text{soft}} \circ \square_y)}_{f_{\text{soft}}}(\mathbf{x}).$$

Salman et al. note that this approximation performs well, and is empirically more effective than an alternative approach proposed by Cohen et al. [14, Appendix G.3].

## I Review of randomized ablation

In this appendix, we review *randomized ablation* [24], which serves as a baseline for the Hamming distance threat model in our experiments. It is based on *randomized smoothing* (see Section 3.1) like our method, however the smoothing mechanism and robustness certificate differ. In this review, we formulate randomized ablation for sequence classifiers; we refer readers to Levine and Feizi [24] for a formulation for image classifiers.

### I.1 Ablation smoothing mechanism

Randomized ablation employs a smoothing mechanism that replaces a random subset of the input elements with a special null value NA. Levine and Feizi use an encoding for the null value tailored for images, that involves doubling the number of channels. This encoding is not suitable for discrete sequences, so we instead augment the sequence domain  $\Omega$  with a special null value:  $\Omega \rightarrow \Omega \cup \{\text{NA}\}$ . The hyperparameter controlling the strength of ablation must also be adapted for our setting. Levine and Feizi use a hyperparameter  $k$  that corresponds to the number of elements *retained* in the output. This is ineffective for inputs that vary in length, so we scale  $k$  in proportion with the input length. Specifically, we introduce an alternative hyperparameter  $p_{\text{ab}} \in (0, 1)$  that represents the fraction of ablated elements and set  $k(|\mathbf{x}|) = \lceil (1 - p_{\text{ab}})|\mathbf{x}| \rceil$ .

Mathematically, the ablation mechanism has the following distribution when applied to an input sequence  $\mathbf{x}$ :

$$\Pr[\phi(\mathbf{x}) = \mathbf{z}] = \sum_{\epsilon \in \mathcal{E}_{k(|\mathbf{x}|)}(\mathbf{x})} \frac{1}{\binom{|\mathbf{x}|}{k(|\mathbf{x}|)}} \mathbf{1}_{\text{ablate}(\mathbf{x}, \epsilon) = \mathbf{z}},$$

where  $\mathcal{E}_k = \{\epsilon \in \mathcal{E}(\mathbf{x}) : |\epsilon| = k\}$  consists of all sets of element indices of size  $k$  and

$$z_i = \text{ablate}(\mathbf{x}, \epsilon)_i = \begin{cases} x_i, & \text{if } i \in \epsilon \text{ “retained”}, \\ \text{NA}, & \text{if } i \notin \epsilon \text{ “ablated”}. \end{cases}$$

*Remark 10.* Hyperparameter  $p_{\text{ab}}$  has a similar interpretation as  $p_{\text{del}}$  for randomized deletion, in that both hyperparameters control the proportion of sequence elements hidden (by ablation or deletion) from the base classifier.

## I.2 Hamming distance robustness certificate

Randomized ablation provides a Hamming distance ( $\ell_0$ ) certificate that guarantees robustness under a bounded number of arbitrary substitutions. Levine and Feizi provide two certificates: one that makes use of the confidence score for the predicted class, and another that makes use of the top two confidence scores. We present the first certificate here, since it matches the certificate we consider in Section 4 and it is the simplest choice for binary classifiers (the focus of our experiments).

To facilitate comparison with randomized deletion, we reuse notation and definitions from Section 4. Recall from (15) that  $\tilde{\rho}(\mathbf{x}; \mu_y)$  is a lower bound on the smoothed classifier’s confidence score  $p_y(\tilde{\mathbf{x}}; h)$  that holds for any input  $\tilde{\mathbf{x}}$  in the edit distance ball of radius  $r$  centered on  $\mathbf{x}$  and any base classifier  $h$  such that  $p_y(\mathbf{x}; h) = \mu_y$ . For randomized ablation, we can replace the edit distance ball with a Hamming distance ball and obtain the following result (see [24] for the derivation):

$$\tilde{\rho}(\mathbf{x}; \mu_y) = \mu_y - 1 + \frac{\binom{|\mathbf{x}| - r}{k(|\mathbf{x}|)}}{\binom{|\mathbf{x}|}{k(|\mathbf{x}|)}}.$$

Recall from Proposition 3, that the smoothed classifier is certifiably robust if  $\tilde{\rho}(\mathbf{x}; \mu_y) \geq \nu_y(\boldsymbol{\eta})$ , where  $\boldsymbol{\eta}$  denotes the smoothed classifier’s tunable decision thresholds. Hence the certified radius  $r^*$  is the maximum value of  $r \in \{0, 1, 2, \dots\}$  that satisfies

$$\mu_y - 1 + \frac{\binom{|\mathbf{x}| - r}{k(|\mathbf{x}|)}}{\binom{|\mathbf{x}|}{k(|\mathbf{x}|)}} - \nu_y(\boldsymbol{\eta}) \geq 0.$$

This maximization problem does not have an analytic solution, however it can be solved efficiently using binary search since the LHS of the above inequality is a non-increasing function of  $r$ . In practice, the exact confidence score  $\mu_y$  can be replaced with a  $1 - \alpha$  lower confidence bound  $\underline{\mu}_y$  to yield a probabilistic certificate that holds with probability  $1 - \alpha$  (see procedure in Figure 1 and Corollary 8).

Since randomized ablation and randomized deletion both admit Hamming distance certificates, it is interesting to compare them. The following result shows that randomized deletion admits a tighter certificate, all else being equal.

**Proposition 11.** *Consider a randomized deletion classifier (RS-Del) with deletion probability  $p_{\text{del}} = p$  and a randomized ablation classifier (RS-Abn) with ablation fraction  $p_{\text{ab}} = p$ . Suppose both classifiers make the same prediction  $y$  with the same confidence score  $\mu_y$  for input  $\mathbf{x}$  and that we are interested in issuing a Hamming distance certificate of radius  $r$ . Then the lower bound on the confidence score over the certified region is tighter for RS-Del than for RS-Abn.*

*Proof.* From Theorem 7 we have

$$\begin{aligned}
\tilde{\rho}_{\text{RS-Del}}(\mathbf{x}; \mu_y) &= \mu_y - 1 + p^r \\
&= \mu_y - 1 + \left( \frac{|\mathbf{x}| - (1-p)|\mathbf{x}|}{|\mathbf{x}|} \right)^r \\
&\geq \mu_y - 1 + \left( \frac{|\mathbf{x}| - \lceil (1-p)|\mathbf{x}| \rceil}{|\mathbf{x}|} \right)^r \\
&= \mu_y - 1 + \prod_{j=1}^r \frac{|\mathbf{x}| - k(|\mathbf{x}|)}{|\mathbf{x}|} \\
&\geq \mu_y - 1 + \prod_{j=1}^r \frac{(|\mathbf{x}| - k(|\mathbf{x}|) - j + 1)}{(|\mathbf{x}| - j + 1)} \\
&= \mu_y - 1 + \frac{\binom{|\mathbf{x}|-r}{k(|\mathbf{x}|)}}{\binom{|\mathbf{x}|}{k(|\mathbf{x}|)}} \\
&= \tilde{\rho}_{\text{RS-Abn}}(\mathbf{x}; \mu_y)
\end{aligned}$$

□

*Remark 12.* Jia et al. [25] extend randomized ablation to top- $k$  prediction, while at the same time proposing enhancements to the Hamming distance certificate. These enhancements also apply to regular classification and involve: (1) discretizing lower/upper bounds on the confidence scores; and (2) using a better statistical method to estimate lower/upper bounds on the confidence scores. However, both of these enhancements would have a negligible impact in our experiments, as we shall now explain. The first enhancement tightens lower/upper bounds on the confidence scores by rounding up/down to the nearest integer multiple of  $q := 1/\binom{|\mathbf{x}|}{k(|\mathbf{x}|)}$ . This improves the lower/upper bound by at most

$$q \leq \min \left\{ \left( \frac{|\mathbf{x}| - k}{|\mathbf{x}|} \right)^{|\mathbf{x}| - k}, \left( \frac{k}{|\mathbf{x}|} \right)^k \right\} \leq \frac{1}{|\mathbf{x}|}$$

if the number of retained elements satisfies  $1 \leq k \leq |\mathbf{x}|$ , as is the case in our experiments. However, since we consider inputs of length  $|\mathbf{x}| \geq 10^3$ , this means the improvement in the bound due to discretization is at most  $q \leq 10^{-3}$ . This improvement is comparable to the resolution of our estimator ( $1/n_{\text{bnd}} \sim 10^{-4}$ ), and consequently, discretization will not have a discernible impact. The second enhancement involves simultaneously estimating lower/upper bounds using a statistical method called SimuEM [93]. SimuEM has been demonstrated to improve tightness when there are multiple classes [25], however it has no impact when there are two classes (as is the case in our experiments).
